# Supplementary material for: Bacterial group II introns generate genetic diversity by circularization and trans-splicing from a population of intron-invaded mRNAs
Source: PubMed Central journal article supplement (PMC6248898; doi:10.1371/journal.pgen.1007792), 2018-11-21
Supplement: pgen.1007792.s001.pdf [file pgen.1007792.s001.pdf]

## L1.LtrB-WT

| <u>Gene name</u>                | <u>5' flanking</u>   |                                  | <u>additional nts</u>                                   | <u>3' flanking</u>   |                       |
|---------------------------------|----------------------|----------------------------------|---------------------------------------------------------|----------------------|-----------------------|
|                                 | EBS2<br><u>GUGUA</u> | EBS1<br><u>GUGUUG</u>            |                                                         | EBS2<br><u>GUGUA</u> | EBS1<br><u>GUGUUG</u> |
| 5'nucleotidase                  | (2)                  | ACA <b>CACUUC</b> <b>CACAAA</b>  | /AAAGAUCAGAUUAG-253-CUU <b>CACAUU</b> <b>UACUGG</b> /   | UGAGGAACUUCGGCA      |                       |
| a-acetolactate decarboxylase    | (1)                  | CAA <b>UACAUU</b> <b>UAGCAC</b>  | /ACUCUCUAGCGGCUU-26--AAG <b>CACUAA</b> <b>CACACG</b> /  | GCAAAGUCGGUAUCG      |                       |
| <u>Ribosomal protein L13/S9</u> | (1)                  | ACC <b>AACAUAC</b> <b>CACACC</b> | /ACAUGCUGAUACAGG-431-GCAG <b>CACAU</b> <b>CGUCUU</b> /  | GUUAUCAACCAACCA      |                       |
| <u>Ribosomal protein L13/S9</u> | (1)                  | ACA <b>CACAUA</b> <b>UACAGC</b>  | /UCAAAAACCCUGAAGU-355-UAC <b>ACGUGA</b> <b>CGCCCG</b> / | UAUGGUUGAACGUAA      |                       |
| <u>Ribosomal protein L13/S9</u> | (2)                  | ACC <b>AACAUAC</b> <b>CACACC</b> | /ACAUGCUGAUACAGG-303-ACA <b>UAUUGG</b> <b>CACAAG</b> /  | UACAAUUGCCGGCA       |                       |
| L-lactate dehydrogenase         | (1)                  | UGC <b>AGCUUA</b> <b>CUCAAU</b>  | /CAUCGCUAAAAAAGG-170-UUC <b>ACAUU</b> <b>CAUUGA</b> /   | ACG AUGCUGAAAUGC     |                       |
| NADH dehydrogenase              | (1)                  | AAC <b>AGCACAC</b> <b>CGCAGC</b> | /AGCGGCAAAUUAUCU-563-CUCA <b>UAAAG</b> <b>CACAUC</b> /  | UAUGGGGUCUCUCCA      |                       |
| ABC transporter permease        | (1)                  | AUG <b>CACUUU</b> <b>CCCAAU</b>  | /UUUCAUCUGUCCGUA-150-UUU <b>CACCUU</b> <b>CUUCCA</b> /  | ACAGCCUUAGUACAU      |                       |
| Glutamine synthetase            | (1)                  | CAU <b>CACAAA</b> <b>CCCAAC</b>  | /AGUUAAACUCAUCAA-386-CAAG <b>CUAUG</b> <b>CACAAU</b> /  | UUGUAUCGCAAUGGG      |                       |
| Glyceraldehyde dehydrogenase    | (1)                  | AAU <b>GUCAUA</b> <b>CACUUC</b>  | /AAACCUUGUUC-----GUA <b>CACUUG</b> <b>CAUACU</b> /      | UCGCUAAAAUCGCUA      |                       |
| Elongation factor Tu            | (1)                  | ACU <b>CCGAAAC</b> <b>CGCGAC</b> | /ACUGACAAACCACUC-362-CUAC <b>UUC</b> <b>CACAAC</b> /    | UGAGGUUACUGGUUC      |                       |
| Ribosomal protein L19           | (1)                  | ACU <b>GAUAU</b> <b>CCUGAC</b>   | /UUUCGUCCUGGUGAC-153-GUU <b>CACACU</b> <b>CCACGU</b> /  | GUUGAAAAAAUCGAA      |                       |
| <i>Ribosomal protein L11</i>    | (4)                  | AUU <b>CACAUU</b> <b>CAUCAC</b>  | /AAAAACUCCUCCAGC-233-CCU <b>CACCUA</b> <b>CUUAGG</b> /  | UAGGCUUUUGGACCUCU    |                       |
| N-acetylglucosaminidase         | (1)                  | GAC <b>AACAAAC</b> <b>CACAAG</b> | /UAAUACCGUUCUACAG-173-GCA <b>CAUCAG</b> <b>CAUCAU</b> / | CUGGUAGUUACACAA      |                       |
| Aldehyde dehydrogenase          | (1)                  | CCA <b>CACGUC</b> <b>CACAAA</b>  | /GCUUUCAUUGUUGCC-254-UUC <b>CGAUGA</b> <b>CGCAAG</b> /  | UUUGAAAGAGAUUCUU     |                       |
| Phosphotransferase              | (1)                  | UAU <b>UGUGUA</b> <b>CACAAC</b>  | /UUUCAUGAGAUUCUUG-94--UAU <b>CACAUU</b> <b>CCUUUG</b> / | UAUGUGGUUGCUUAA      |                       |
| Ferredoxin oxidoreductase       | (1)                  | GAC <b>CCUUUA</b> <b>UACAAC</b>  | /AAAUGAACAGGAACA-107-AAG <b>CACUUU</b> <b>CAGAAA</b> /  | UGUCGGAUGAUUUAC      |                       |
| ABC transporter                 | (1)                  | UGA <b>ACAUAU</b> <b>UUGCGAU</b> | /UCUAGGCCGUUCAGG-136-UAU <b>CUCUUU</b> <b>UGCAACA</b> / | ACGGUUCGUUCUAAU      |                       |
| g-aminobutyrate permease        | (1)                  | ACU <b>CAUUAU</b> <b>CGCAAC</b>  | /UUAAUGAUGAUAAAA-56--UUC <b>ACAUCA</b> <b>CUAUUG</b> /  | AUUUUUUUUACUCCA      |                       |
| <u>Uncharacterized prot 1-2</u> | (1)                  | UAG <b>ACCUUC</b> <b>CACGAU</b>  | /UUUAUGAUUACCUAG-214-AAC <b>CACAGA</b> <b>CACAAU</b> /  | UAAAAUUUUGCUACA      |                       |
| Thioredoxin reductase           | (1)                  | AAU <b>CAUUAU</b> <b>CGCGAC</b>  | /UGGAGCUAAUCACCG-185-AAU <b>UACGUG</b> <b>CACAAG</b> /  | AAAUUUUUCAACAAA      |                       |
| Arsenate reductase              | (1)                  | CAC <b>AAUCUA</b> <b>UACAGC</b>  | /ACCCUCUUGUACAAG-185-UUU <b>CACUUU</b> <b>CACAAG</b> /  | CAAUUAAAAUCAUUU      |                       |
| NADH dehydrogenase              | (1)                  | AAC <b>AGCACAC</b> <b>CACAGC</b> | /AGCGGCAAAUUAUCU-173-CAG <b>CACAUU</b> <b>UAUUUCU</b> / | GGCGUUUAGCCUUGG      |                       |
| Transcriptional regulator       | (1)                  | UAA <b>AACGCAC</b> <b>CACGAC</b> | /AACAAUGGUUUCAAU-173-ACA <b>GCUUUG</b> <b>CAACUG</b> /  | UAAAAUUUUGAUGGUU     |                       |
| Uncharacterized protein         | (1)                  | AAA <b>CACAAG</b> <b>UCUACU</b>  | /GGAAAAUUAUCAAA-284-UGA <b>CUCAGG</b> <b>CACCAA</b> /   | AAAAGAAAGCAGCAA      |                       |
| Ser/Thr protein kinase          | (1)                  | AAC <b>AAUACA</b> <b>UCAACC</b>  | /AAAAUGCUCUCUACAG-51--UGG <b>CUCAU</b> <b>UACAAG</b> /  | GAAUUUUUACCCGUG      |                       |
| a-acetolactate decarboxylase    | (1)                  | CAA <b>UACAUU</b> <b>UACGAC</b>  | /ACUCUCUAGCGGCUU-50--GUA <b>UCGGUA</b> <b>CGCUUG</b> /  | AUACGGCAAUUGGCG      |                       |
| Ribosomal protein S14           | (1)                  | AAU <b>ACAUAU</b> <b>AAUGGCU</b> | /AAGAAAUCUAUGGUU-64--GUC <b>CACAUU</b> <b>CAGUUU</b> /  | ACCGCAAUUUAAAC       |                       |
| N-acetylglucosaminidase         | (1)                  | UAA <b>CUCAAA</b> <b>CUCGAC</b>  | /UUCUUCUAAUCUCAA-50--AAA <b>UAUCU</b> <b>GGCAGCC</b> /  | CAAUUGCUUCAUCA       |                       |

**Figure S1.** mRNA fragments identified at the splice junction of L1.LtrB-WT circles. Additional nts are shown along with their flanking sequences (5' flanking) (3' flanking), their origin (Gene name) and frequency of identification between parentheses. The junctions between the additional nts and their flanking regions (/) as well as the IBS1- (yellow) and IBS2- (green) like sequences are denoted. The bolded nts represent residues from the IBS1- and IBS2-like sequences that can potentially base pair with the intron's EBS1 and EBS2 sequences specified above. Sequences spanning two genes and including a short intergenic region are underlined while the mRNA sequence including 3' untranslated residues is italicized.
