# Supplementary material for: Bacterial group II introns generate genetic diversity by circularization and trans-splicing from a population of intron-invaded mRNAs
Source: PubMed Central journal article supplement (PMC6248898; doi:10.1371/journal.pgen.1007792), 2018-11-21
Supplement: pgen.1007792.s005.pdf [file pgen.1007792.s005.pdf]

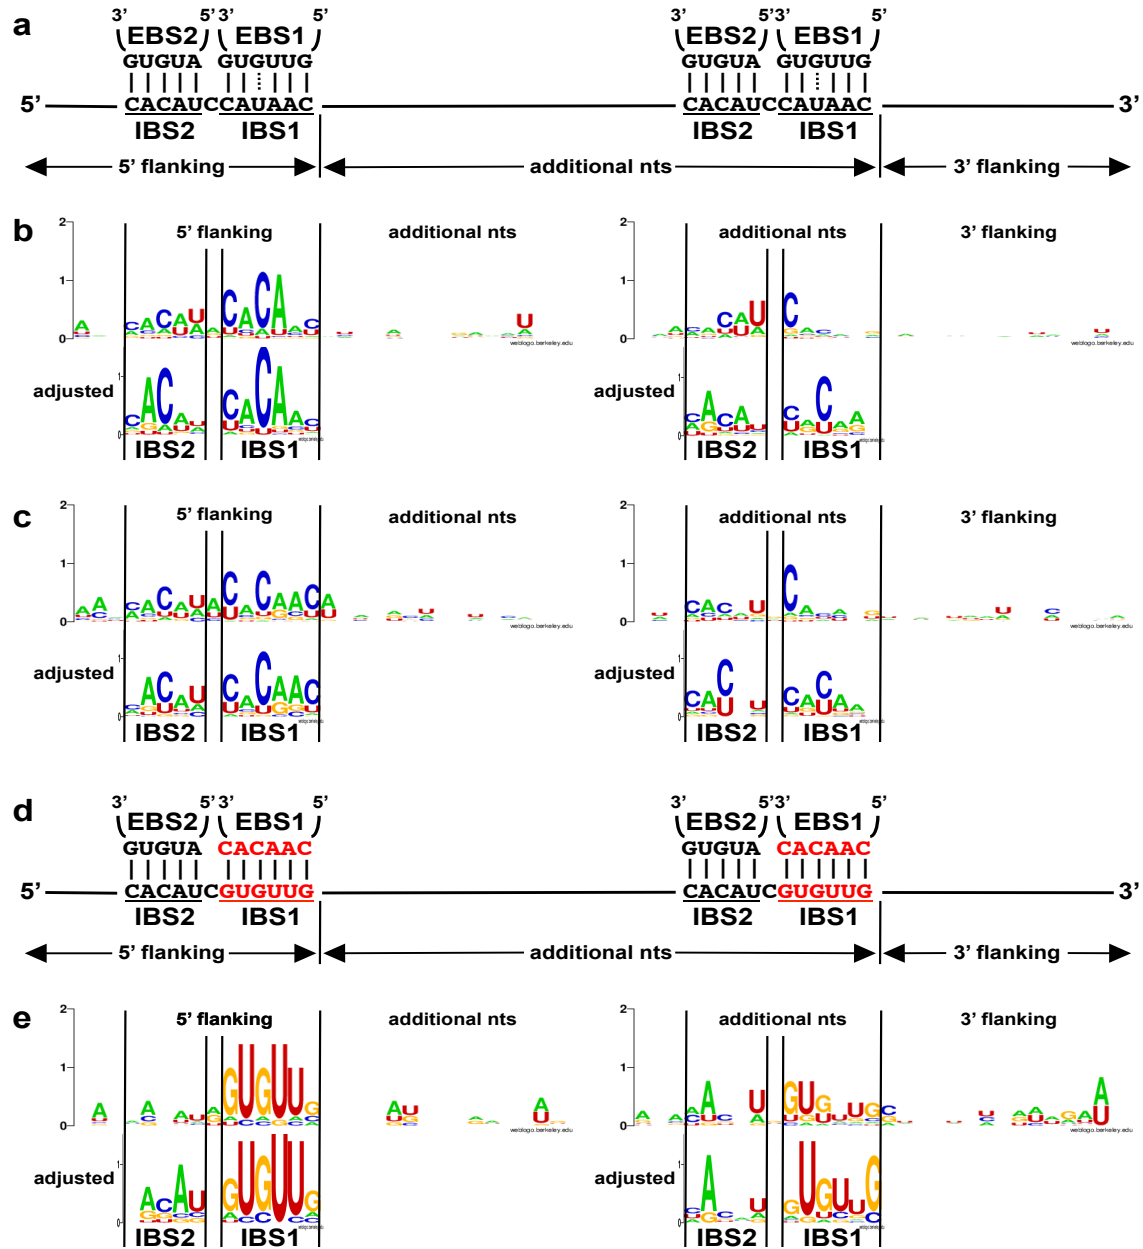

**Figure S5.** Logo representation of the consensus sequences (30 nts) around the 5' and 3' extremities of the mRNA fragments identified at intron circle splice junctions. The EBS1-IBS1 and EBS2-IBS2 base pairing interactions for L1.LtrB- $\Delta$ LtrA+LtrA and L1.LtrB-WT (**a**) as well as L1.LtrB-EBS1/Mut- $\Delta$ LtrA+LtrA (**d**) are depicted. The consensus (Figure 3, S1) and adjusted consensus (Figure S2-S4) sequences are shown for L1.LtrB- $\Delta$ LtrA+LtrA (**b**), L1.LtrB-WT (**c**) and L1.LtrB-EBS1/Mut- $\Delta$ LtrA+LtrA (**e**).
