# Supplementary material for: Bacterial group II introns generate genetic diversity by circularization and trans-splicing from a population of intron-invaded mRNAs
Source: PubMed Central journal article supplement (PMC6248898; doi:10.1371/journal.pgen.1007792), 2018-11-21
Supplement: pgen.1007792.s006.pdf [file pgen.1007792.s006.pdf]

**Table S1.** Plasmids

| Plasmid name                                                 | Size and antibiotic resistance      | Description                                                                                                                                   |
|--------------------------------------------------------------|-------------------------------------|-----------------------------------------------------------------------------------------------------------------------------------------------|
| pDL-P <sub>23</sub> <sup>2</sup> -Ll.LtrB-WT                 | 11 kb, Spc <sup>R</sup> (300μg/μl)  | <i>E. coli-L. lactis</i> shuttle vector harboring wild-type Ll.LtrB expressed under the control of the P <sub>23</sub> constitutive promoter  |
| pDL-P <sub>23</sub> <sup>2</sup> -Ll.LtrB-ΔLtrA              | 9.2 kb, Spc <sup>R</sup> (300μg/μl) | Ll.LtrB lacking its essential intron-encoded protein (LtrA)                                                                                   |
| pDL-P <sub>23</sub> <sup>2</sup> -Ll.LtrB-ΔA-ΔLtrA           | 9.2 kb, Spc <sup>R</sup> (300μg/μl) | Ll.LtrB lacking LtrA and the branch point adenosine residue                                                                                   |
| pDL-P <sub>23</sub> <sup>2</sup> - Ll.LtrB-EBS1/Mut-ΔLtrA    | 9.2 kb, Spc <sup>R</sup> (300μg/μl) | Ll.LtrB lacking LtrA and mutated in the EBS1 (intron) and IBS1 (exon1) regions to modify base pairing specificity                             |
| pDL-P <sub>23</sub> <sup>2</sup> - Ll.LtrB-ΔA-EBS1/Mut-ΔLtrA | 9.2 kb, Spc <sup>R</sup> (300μg/μl) | Ll.LtrB lacking LtrA, the branch point adenosine and mutated in the EBS1 (intron) and IBS1 (exon1) regions to modify base pairing specificity |
| pLE-P <sub>23</sub> <sup>2</sup> -LtrA                       | 10.9 kb, Cam <sup>R</sup> (10μg/μl) | <i>E. coli-L. lactis</i> shuttle vector harboring the ltrA gene expressed under the control of the P <sub>23</sub> constitutive promoter      |
| pLE-P <sub>23</sub> <sup>2</sup> -LtrA+AlaS                  | 11.7 kb, Cam <sup>R</sup> (10μg/μl) | Alanyl-tRNA synthetase gene ( <i>alaS</i> ) from <i>L. lactis</i> expressed under the control of the P <sub>23</sub> constitutive promoter    |
| pLE-P <sub>23</sub> <sup>2</sup> -LtrA+EnoA                  | 10.4 kb, Cam <sup>R</sup> (10μg/μl) | Enolase gene ( <i>enoA</i> ) from <i>L. lactis</i> expressed under the control of the P <sub>23</sub> constitutive promoter                   |
