# Supplementary material for: Bacterial group II introns generate genetic diversity by circularization and trans-splicing from a population of intron-invaded mRNAs
Source: PLOS journal article supplement (doi:10.1371/journal.pgen.1007792), 2018-11-21
Supplement: S3 (10.1371/journal.pgen.1007792.s003) [file journal.pgen.1007792.s003]

## L1.LtrB-WT

| <u>Gene name</u>                | <u>5' flanking</u>   |                                 | <u>additional nts</u>                                                               | <u>3' flanking</u>   |                       |
|---------------------------------|----------------------|---------------------------------|-------------------------------------------------------------------------------------|----------------------|-----------------------|
|                                 | EBS2<br><u>GUGUA</u> | EBS1<br><u>GUGUUG</u>           |                                                                                     | EBS2<br><u>GUGUA</u> | EBS1<br><u>GUGUUG</u> |
| 5'nucleotidase                  | (2)                  | ACA <b>CACUUC</b> <b>CACAAA</b> | /AAAGAUCAUAUAG-253-CUU <b>CACAUU</b> <b>UACUGG</b> /                                | UGAGGAACUUCGGCA      |                       |
| a-acetolactate decarboxylase    | (1)                  | CAA <b>UACAUU</b> <b>UAGCAC</b> | /ACUCUCUAGCGGCUU-26--AAG <b>CACUA</b> <b>ACACACG</b> /                              | GCAAAGUCGGUAUCG      |                       |
| <u>Ribosomal protein L13/S9</u> | (1)                  | ACC <b>ACAU</b> <b>ACACAC</b>   | /ACAUGCUGAUACAGG-431-GCAGACA <b>UGCGUCUU</b> <b>/GUU</b> AUCAACCAACCA               |                      |                       |
| <u>Ribosomal protein L13/S9</u> | (1)                  | ACA <b>CACACA</b> <b>UACAGC</b> | /UCAAAAACUGAAGU-355-UA <b>CACGU</b> <b>ACGCGCCG</b> /                               | UAUGGUUGAACGUAA      |                       |
| <u>Ribosomal protein L13/S9</u> | (2)                  | ACC <b>ACAU</b> <b>ACACAC</b>   | /ACAUGCUGAUACAGG-303-ACAU <b>U</b> <b>UAG</b> <b>CACAAG</b> /                       | UACAAUAUGCCGGCA      |                       |
| <u>L-lactate dehydrogenase</u>  | (1)                  | UGC <b>AGCUUA</b> <b>CUCAAU</b> | /CAUCGCUAAAAAAGG-170-UU <b>CACAUU</b> <b>CAUUGA</b> /                               | ACGAUGCUGAAAUUGC     |                       |
| NADH dehydrogenase              | (1)                  | AAC <b>AGCAC</b> <b>ACACAGC</b> | /AGCGGC AAAUAUUCU-563-CU <b>CAUAA</b> <b>AGCAAC</b> UG/                             | AAUGGGGUCUCUCCA      |                       |
| ABC transporter permease        | (1)                  | AUG <b>CACUUC</b> <b>CCCAAU</b> | /UUUCAUCUGUCCGUA-150-UUUC <b>ACUGG</b> <b>UUCUA</b> <b>/AC</b> AGCCCUAGUACAU        |                      |                       |
| Glutamine synthetase            | (1)                  | CAU <b>CACAA</b> <b>CCCAAC</b>  | /AGUUAACUCAUACAA-386-CAA <b>GUU</b> <b>U</b> <b>CACA</b> <b>AAU</b> /               | UUGUAUCGCAUUGGG      |                       |
| Glyceraldehyde dehydrogenase    | (1)                  | AA <b>UGUCA</b> <b>UACAUUC</b>  | /AAACCUUGUUC-----GUA <b>CACUUC</b> <b>CAUACU</b> /                                  | UCGCUAAAAUCGCUA      |                       |
| Elongation factor Tu            | (1)                  | ACUC <b>CAGA</b> <b>CGCGAC</b>  | /ACUGACAAACCACUC-362-CUA <b>CUUCC</b> <b>ACACAAC</b> /                              | UGACGUUACUGGUUC      |                       |
| Ribosomal protein L19           | (1)                  | ACU <b>GAU</b> <b>UCCUGAC</b>   | /UUCGGUCCUGGUGAC-153-GUUC <b>ACACU</b> <b>CA</b> <b>CGU</b> <b>/GUU</b> GAAAAAUCGAA |                      |                       |
| <u>Ribosomal protein L11</u>    | (4)                  | AUU <b>CACAU</b> <b>CAUCAC</b>  | /AAAAACUCCUCCAGC-233-CCU <b>CACCU</b> <b>ACUUAGG</b> /                              | UAGGCUUUGGAACCU      |                       |
| <u>N-acetylglucosaminidase</u>  | (1)                  | GAC <b>AAU</b> <b>UACAG</b>     | /UAAUACCGUUCAG-173-GCA <b>CAU</b> <b>U</b> <b>CAU</b> <b>CAU</b> /                  | UCGUUAAUACACAA       |                       |
| Aldehyde dehydrogenase          | (1)                  | CCA <b>CAGUC</b> <b>CACAAA</b>  | /GCUUUCAUUGUUGCC-254-UUCC <b>U</b> <b>UAG</b> <b>CGCAAG</b> /                       | UUUGAAAGAGAUCUU      |                       |
| Phosphotransferase              | (1)                  | UAU <b>CUGGU</b> <b>ACACAAC</b> | /UUCAUGAGAUUCUUG-94--UAU <b>CACAU</b> <b>UCCUUG</b> <b>/U</b> AUGUGGUUGCUUAA        |                      |                       |
| Ferredoxin oxidoreductase       | (1)                  | GAC <b>CCCUU</b> <b>UACAAC</b>  | /AAAUGAACAGGAACA-107-AAG <b>CACUUC</b> <b>CCAGAA</b> /                              | UGUCGGAUGAUUUAC      |                       |
| ABC transporter                 | (1)                  | UGAA <b>CAU</b> <b>UUGCGAU</b>  | /UCUAGCGCGUUCAGG-136-UA <b>UCU</b> <b>CUU</b> <b>UGCAAC</b> A/                      | ACGUUUCGUUCUAAU      |                       |
| g-aminobutyrate permease        | (1)                  | ACUC <b>AUU</b> <b>UUGCAAC</b>  | /UUAUGAUGAUAAAA-56--UU <b>CACAU</b> <b>CACU</b> <b>UUG</b> /                        | AUUUUUUUUACUCCA      |                       |
| <u>Uncharacterized prot 1-2</u> | (1)                  | UA <b>GACCU</b> <b>UCCACGAU</b> | /UUAUAGUAUACCUAG-214-AAC <b>CACAG</b> <b>AAACA</b> <b>AAU</b> /                     | UAAAAUUAUUGCUACA     |                       |
| Thioredoxin reductase           | (1)                  | AAU <b>CAU</b> <b>UUGCGAC</b>   | /UGGAGCUAAUACCCG-185-AAU <b>UACGU</b> <b>GCACAAG</b> /                              | AAAUAUUUACAACAA      |                       |
| Arsenate reductase              | (1)                  | CAC <b>AAU</b> <b>CUUACAG</b>   | /ACCCUCUUGUACAAG-185-UUU <b>CACUUC</b> <b>CACAAG</b> /                              | CAAUUAAUACAUUU       |                       |
| NADH dehydrogenase              | (1)                  | AAC <b>AGCAC</b> <b>ACACAGC</b> | /AGCGGC AAAUAUUCU-173-CAG <b>CACAU</b> <b>UUAUUUCU</b> /                            | GGCGUUUAGCCUUGG      |                       |
| Transcriptional regulator       | (1)                  | UAA <b>ACGCA</b> <b>CACGAC</b>  | /AACAAUGGUUUCAAU-173-AC <b>AGCUU</b> <b>UGCAAC</b> UG/                              | UAAAUUUUGAUGGUU      |                       |
| Uncharacterized protein         | (1)                  | AAA <b>CACA</b> <b>AGUUAU</b>   | /GGAAAAUAUAUACAA-284-UGA <b>CUCAG</b> <b>GCACCA</b> /                               | AAAAGAAAGCAGCAA      |                       |
| Ser/Thr protein kinase          | (1)                  | AAC <b>AAU</b> <b>ACAUCAAC</b>  | /AAAAUGCUCUUCUAG-51--UGG <b>CUCU</b> <b>UUCACA</b> <b>UG</b> /                      | GAAUUAUUCACCGUG      |                       |
| a-acetolactate decarboxylase    | (1)                  | CAA <b>UACAU</b> <b>UACGAC</b>  | /ACUCUCUAGCGGCUU-50--GUAUC <b>GGUA</b> <b>CGUUG</b> <b>/AU</b> ACGGCAAUUGGCG        |                      |                       |
| Ribosomal protein S14           | (1)                  | AA <b>UACAU</b> <b>AAUUGGCU</b> | /AAGAAAUCAUUGGUU-64--GUCCACA <b>UUCAGUUU</b> <b>/ACC</b> GCAAAUUUAAAC               |                      |                       |
| N-acetylglucosaminidase         | (1)                  | UAA <b>CUCAA</b> <b>CUCGAC</b>  | /UUCUUCUAAUCUAAA-50--AAA <b>UACU</b> <b>GGCAGC</b> C/                               | CAAUUGCUUCAAUCA      |                       |

**Figure S3.** mRNA fragments identified at the splice junction of L1.LtrB-WT circles. Additional nts are shown along with their flanking sequences (5' flanking) (3' flanking), their origin (Gene name) and frequency of identification between parentheses. The junctions between the additional nts and their flanking regions (/) as well as the IBS1- (yellow) and IBS2- (green) like sequences are denoted. Some IBS1/2-like sequences were adjusted to optimize their potential base pairing with the EBS1/2 sequences of the intron. The number of nts separating the IBS1/2-like sequences was fixed between 0-2 nts, and their maximum distance from the junction with the intron was fixed between -14, +4 nts. The bolded nts represent residues from the IBS1- and IBS2-like sequences that can potentially base pair with the intron's EBS1 and EBS2 sequences specified above. Sequences spanning two genes and including a short intergenic region are underlined while the mRNA sequence including 3' untranslated residues is italicized.
